# Supplementary material for: Urea as a Cocrystal Former—Study of 3 Urea Based Pharmaceutical Cocrystals
Source: MDPI journal article supplement (doi:10.3390/pharmaceutics13050671), 2021-05-07
Supplement: s1 [file s1]

# Supplementary Materials: Urea As a Cocrystal Former—Study of 3 Urea Based Pharmaceutical Cocrystals

Fucheng Leng, Koen Robeyns and Tom Leyssens

CCDC 2076912–2076914 contain the supplementary crystallographic data for this paper. These data can be obtained free of charge from The Cambridge Crystallographic Data Centre via [www.ccdc.cam.ac.uk/structures](http://www.ccdc.cam.ac.uk/structures)

**Table S1.** List of APIs used in cocrystal screen.

| <b>Naproxen</b>            | <b>Ketoprofen</b>               | <b>Ibuprofen</b>       |
|----------------------------|---------------------------------|------------------------|
| Aspirin                    | Caffeine                        | Phenacetine            |
| Acetaminophen              | Theophylline(reported)          | Levetiracetam          |
| Pramiracetam               | Fasoracetam                     | Carphdon               |
| Sunifiram                  | Aniracetam                      | Piracetam              |
| Nefiracetam                | Coluracetam                     | Nicotinamide(reported) |
| Idebenone                  | Fladrafinil                     | Oxcarbamazepine        |
| Salicylamide               | L-penicillamine                 | Diprophylline          |
| Primidone                  | Xanthine                        | Sulfathiazole          |
| Theophylline-7-acetic acid | Hydroquinone(reported)          | Phloroglucinol         |
| Isonicotinic acid          | Etofylline                      | Dyphylline             |
| 2-Ethoxybenzamide          | 3-Hydroxy-2-naphthoic acid(new) | Sulfacetamide          |
| L-Ascorbic acid            | 4-Nitroaniline                  | Anthranilic acid       |
| Acetanilide                | Formanilide                     | Thiobenzamide          |
| Nicotinic acid             | 3-Aminobenzamide                | Praziquantel           |
| S-methyl-L-cysteine        | L-Pyrogutamic acid              | Indoprofen             |
| Lidocaine                  | Ellagic acid(new)               | Flurbiprofen           |
| Quercetin                  | Rutin                           | Catechin(new)          |
| Epicatechin                | Salicylic acid(reported)        |                        |

**Table S2.** Crystallographic data of UE obtained from Rietveld refinement

|                                        |                                                                                     |
|----------------------------------------|-------------------------------------------------------------------------------------|
| Chemical formula                       | C <sub>14</sub> H <sub>6</sub> O <sub>8</sub> , 2(CH <sub>4</sub> N <sub>2</sub> O) |
| Formula mass                           | 315.32                                                                              |
| Crystal system                         | Triclinic                                                                           |
| a/Å                                    | 11.6649(15)                                                                         |
| b/Å                                    | 6.8628(4)                                                                           |
| c/Å                                    | 6.1953(4)                                                                           |
| α/°                                    | 72.912(4)                                                                           |
| β/°                                    | 114.354(4)                                                                          |
| γ/°                                    | 115.491(3)                                                                          |
| Unit cell volume/Å <sup>3</sup>        | 403.74(6)                                                                           |
| Temperature/K                          | 293                                                                                 |
| Space group                            | P -1                                                                                |
| Z (formula units per unit cell)        | 1                                                                                   |
| Radiation type                         | Cu Kα1                                                                              |
| 2θ range/°                             | 2.09–62.285                                                                         |
| Number of reflections                  | 557                                                                                 |
| R factors not corrected for background |                                                                                     |
| R /%                                   | 5.0768                                                                              |
| wR /%                                  | 7.1968                                                                              |
| R <sub>exp</sub> /%                    | 4.0738                                                                              |
| χ <sup>2</sup>                         | 3.1209                                                                              |
| R factors background corrected         |                                                                                     |
| R <sub>p</sub> /%                      | 20.7037                                                                             |
| R <sub>wp</sub> /%                     | 19.1944                                                                             |
| Re /%                                  | 10.8651                                                                             |
| χ <sup>2</sup>                         | 3.2511                                                                              |

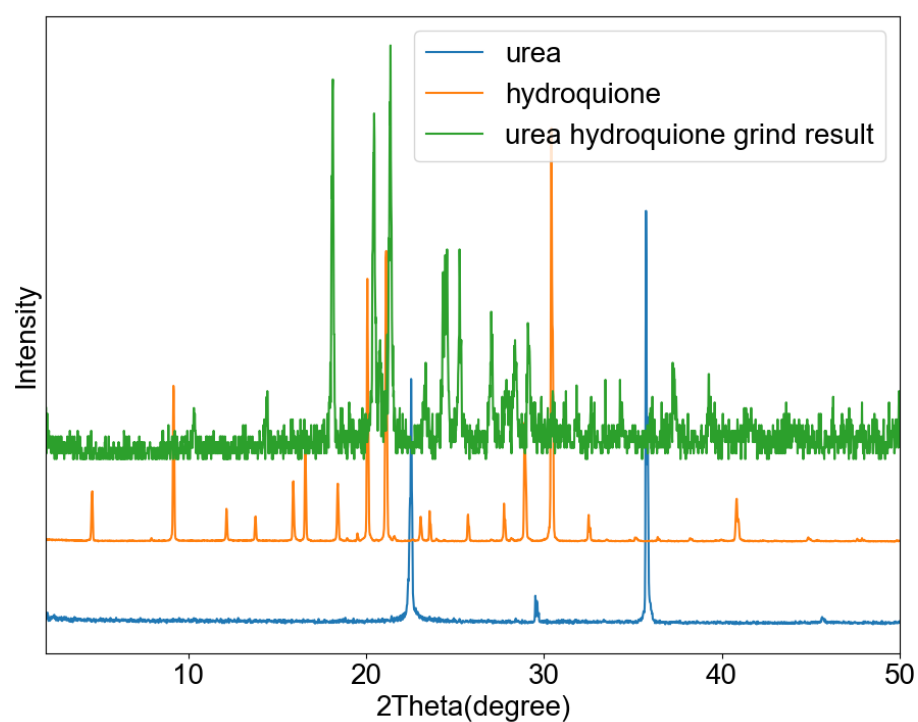

**Figure S1.** PXRD profiles of urea, hydroquinone, and urea hydroquinone cocrystal obtained by grinding.

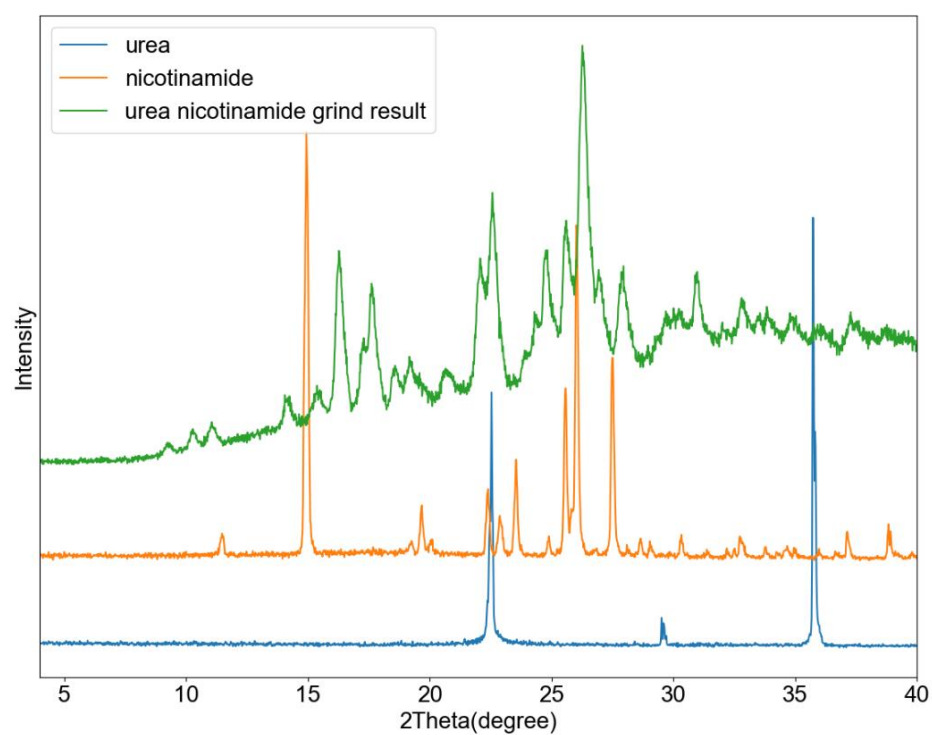

**Figure S2.** PXRD profiles of urea, nicotinamide, and urea nicotinamide cocrystal obtained by grinding.

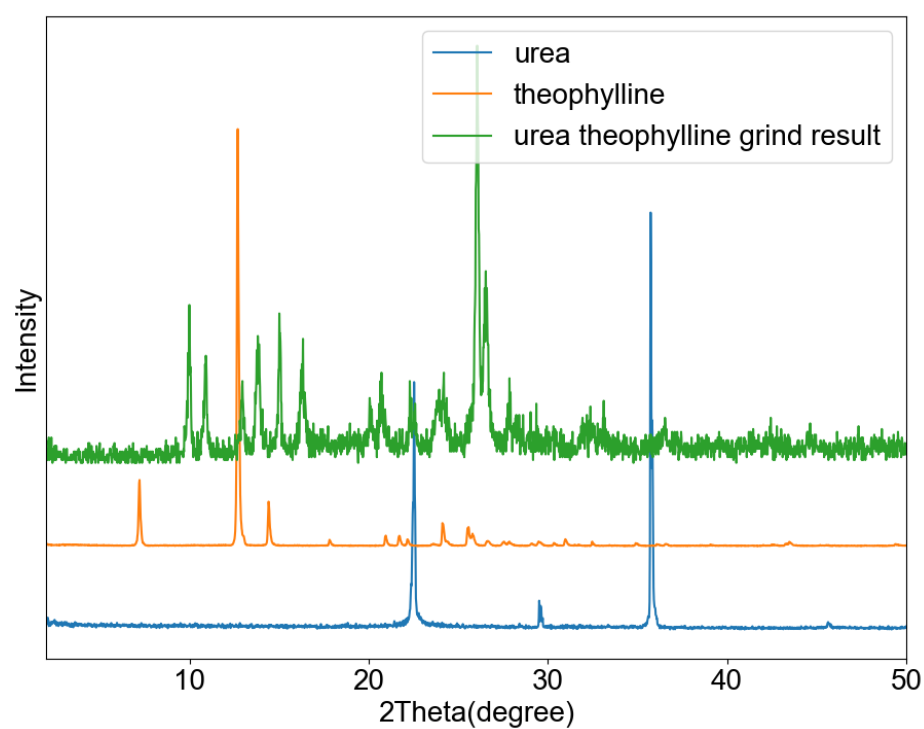

**Figure S3.** PXRD profiles of urea, theophylline, and urea theophylline cocrystal obtained by grinding.

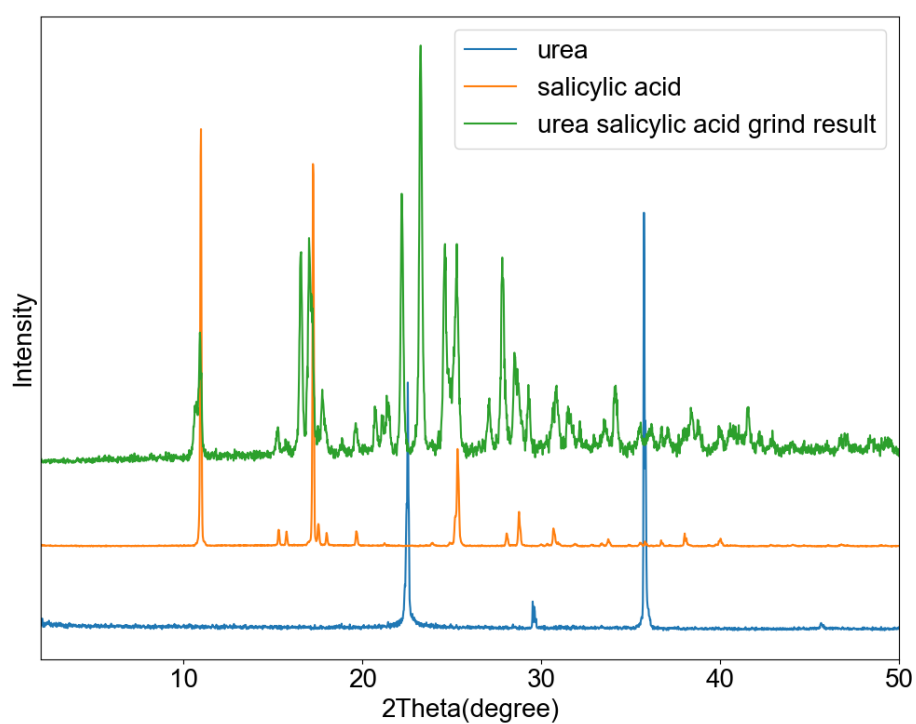

**Figure S4.** PXRD profiles of urea, salicylic acid, and urea salicylic acid cocrystal obtained by grinding.

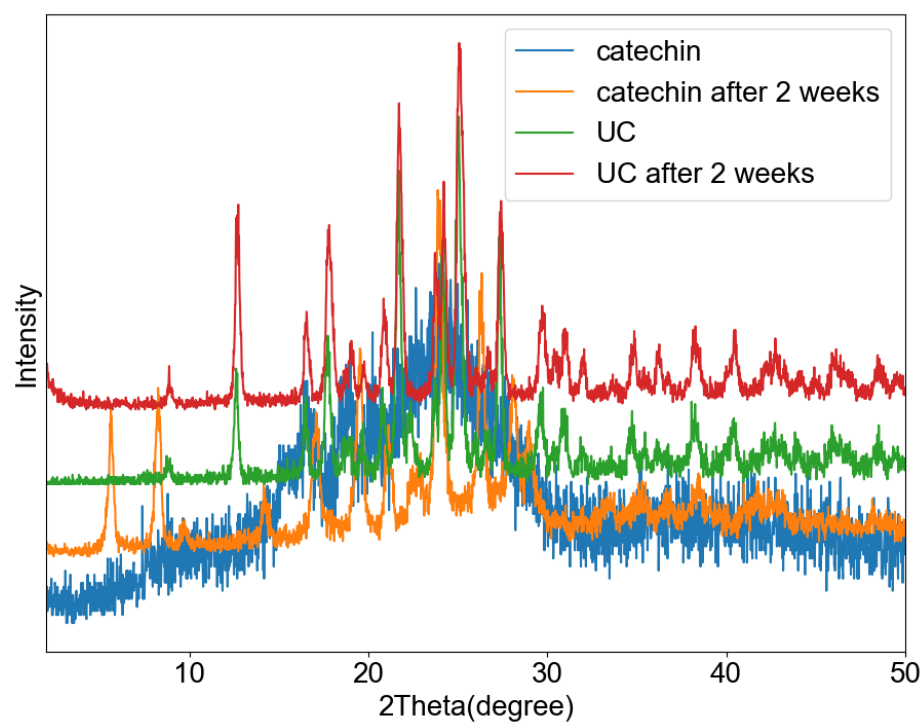

**Figure S5.** PXRD profiles of catechin and UC before and after storage at 25 °C and 75% relative humidity for two weeks.

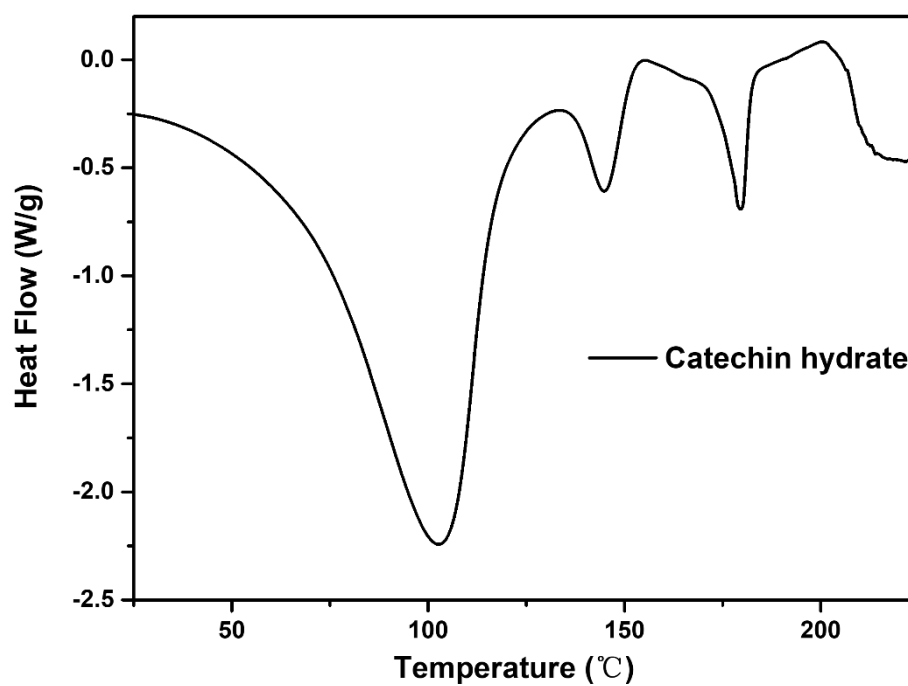

**Figure S6.** DSC thermogram of catechin hydrate.

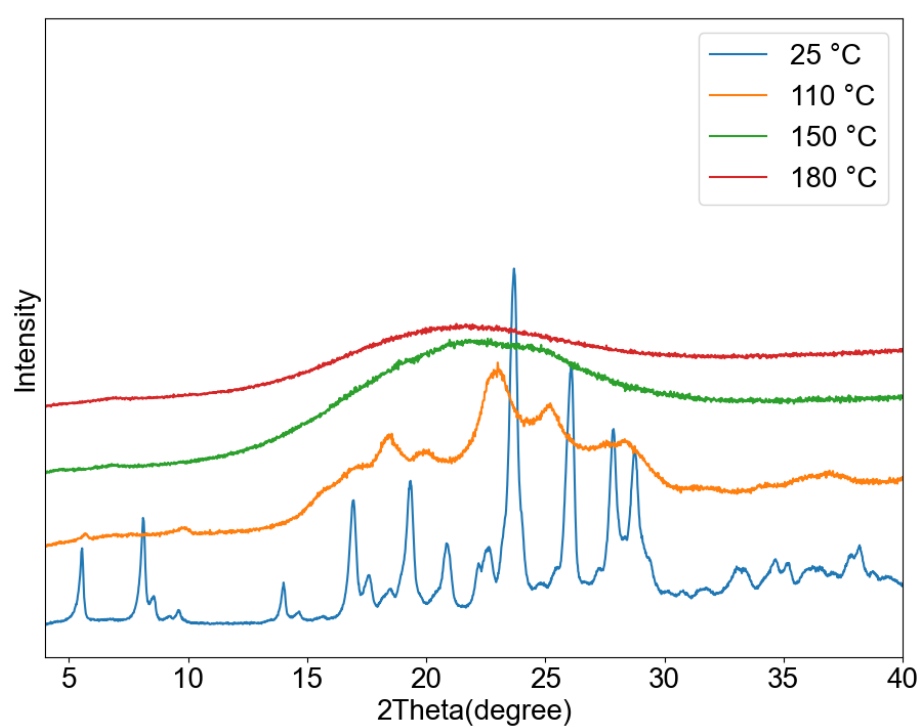

Figure S7. VT-PXRD profile of catechin hydrate.

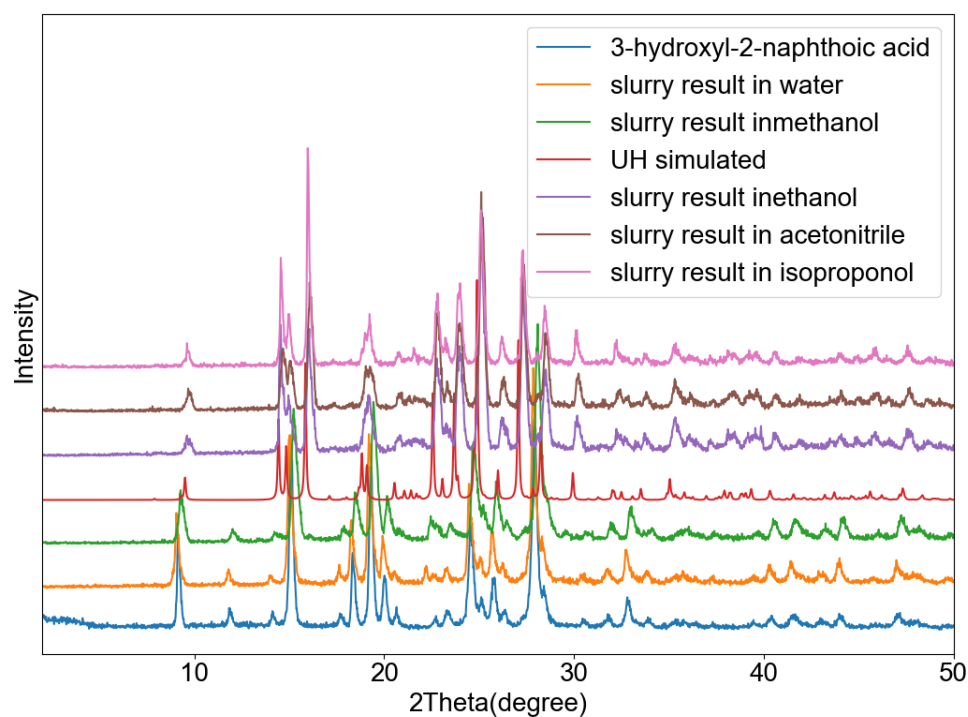

Figure S8. PXRD of UH congruency experiments in different solvents.

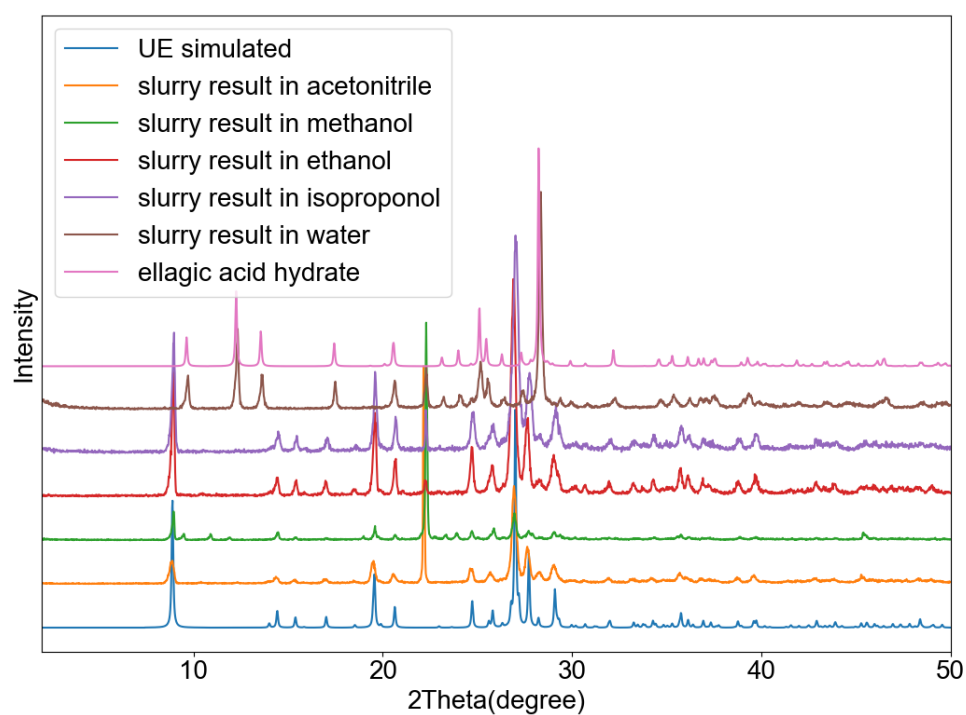

Figure S9. PXRD of UE congruency experiments in different solvents.

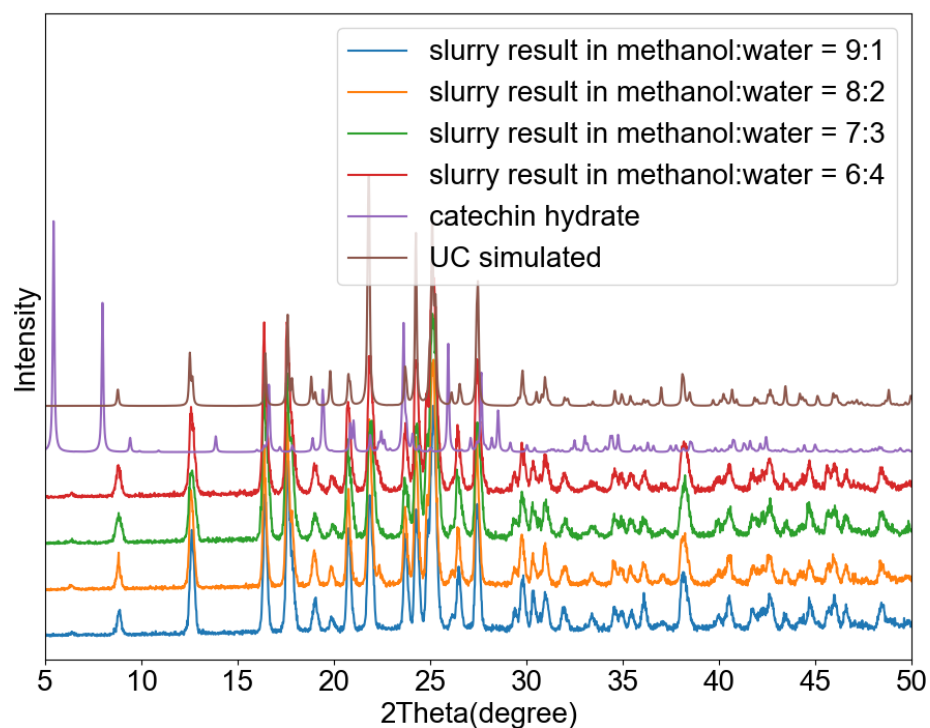

Figure S10. PXRD of congruency experiments of UC in water/methanol mixed solvents (from 1:9 to 4:6).

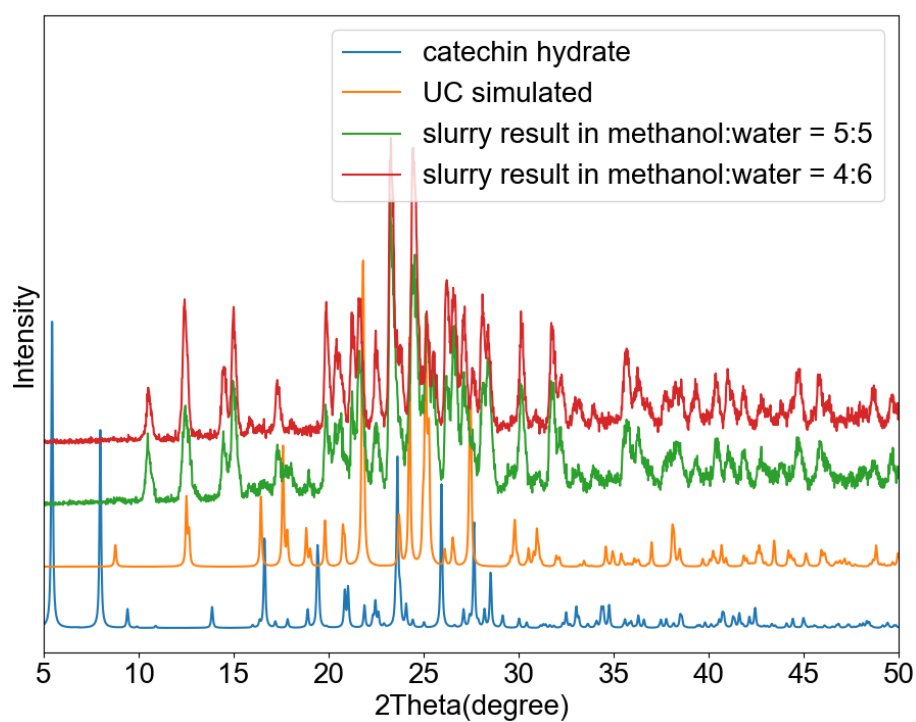

**Figure S11.** PXRD of congruency experiments of UC in water/methanol mixed solvent (from 5:5 to 6:4).

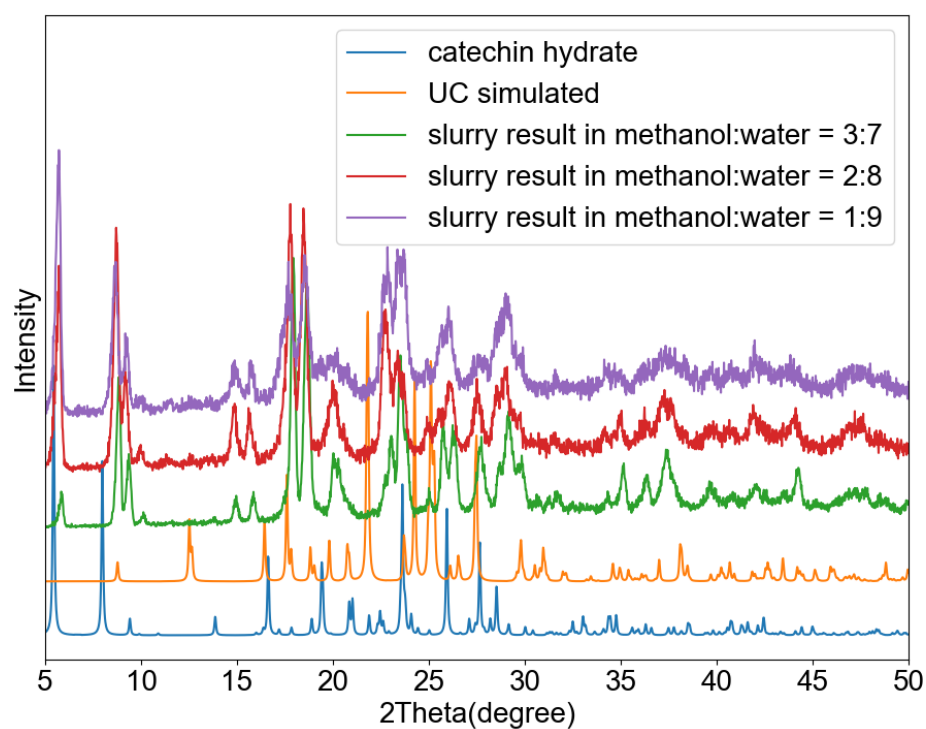

**Figure S12.** PXRD of congruency experiments of UC in water/methanol mixed solvent (from 7:3 to 9:1).

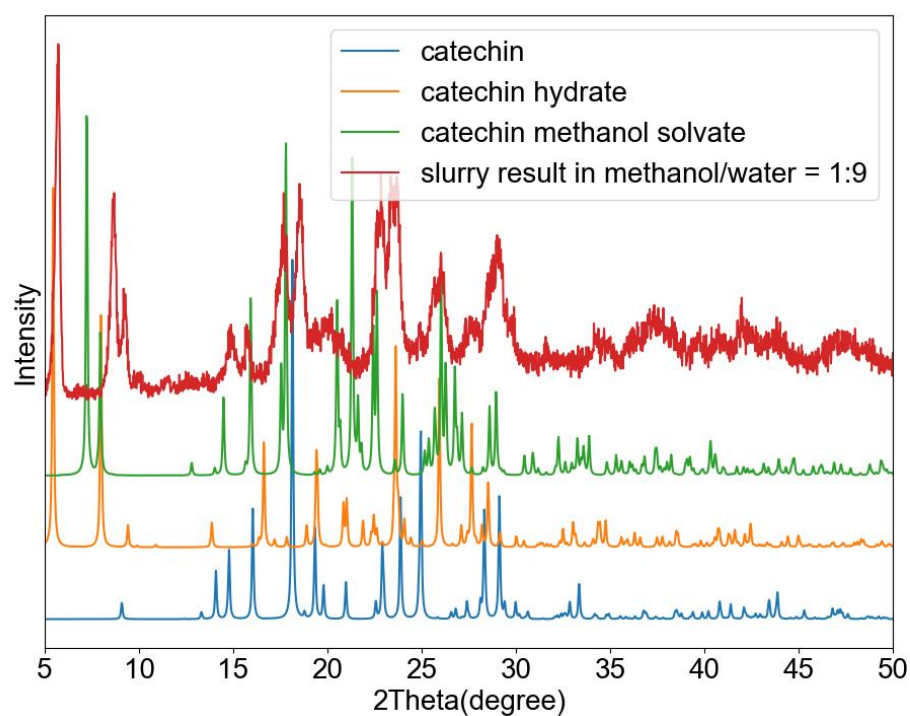

**Figure S13.** PXRD profiles of the catechin solvate obtained from slurrying urea and catechin in mixed solvents of methanol and water (1:9), and reported catechin polymorph or solvate.

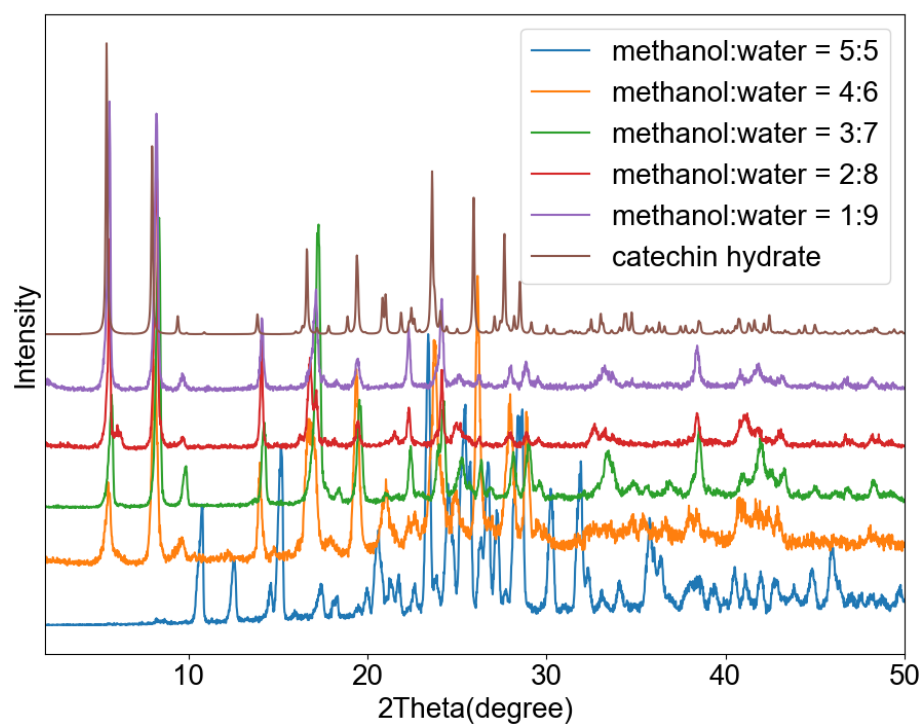

**Figure S14.** PXRD profiles of catechin slurry results in methanol/water mixed solvents.



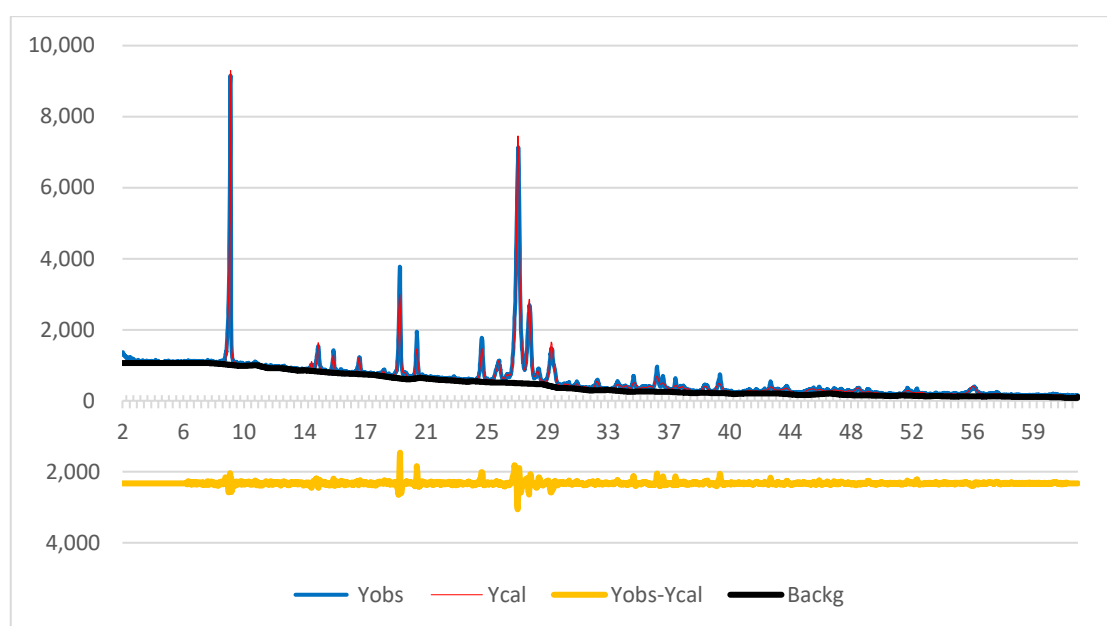

**Figure S15.** XRPD structure resolution data for the ellagic acid urea cocrystal.
